# Supplementary material for: Constructing low-cost and high-strength ultra-low-density proppants based on the modification of activated carbon framework with in situ hydrolyzed silane
Source: Royal Society of Chemistry journal article supplement (doi:10.1039/d3se01311a), 2023-12-24
Supplement: d3se01311a1.pdf [file d3se01311a1.pdf]

## Supplementary Information

### Constructing low-cost and high-strength ultra-low-density proppants based on the modification of activated carbon framework with in-situ hydrolyzed silane

Zhen Zeng<sup>a</sup>, Shiqiang Wang<sup>a</sup>, Ermei Liu<sup>b</sup>, Wei Qin<sup>a</sup>, Yang Zhou<sup>a</sup>, Zhenyong Li<sup>a</sup>, Yu Song<sup>a</sup>, Min Xu<sup>a</sup>, Fuli Bian<sup>b\*</sup>,  
Xianyan Ren<sup>a\*</sup>

<sup>(a)</sup>*School of Materials and Chemistry, Southwest University of Science and Technology, Mianyang 621010, China;*

<sup>(b)</sup>*Cooper (Ningbo) Electric Co, Ningbo, Zhejiang 315000, China;*

<sup>(c)</sup>*Shanghai Fire Research Institute of MEM, Shanghai 200032, People's Republic of China)*

\* Corresponding author: The corresponding authors contribute equally to this work.

E-mail address: [renxianyan@swust.edu.cn](mailto:renxianyan@swust.edu.cn); [bianfuli@shfri.cn](mailto:bianfuli@shfri.cn).

**Tab.S1. The molecular weight distribution of thermosetting phenolic resins (PFNH-230).**

| Peak No | Mp   | Mn   | Mw   | Mz    | Mz+1  | Mv   | PD      |
|---------|------|------|------|-------|-------|------|---------|
| 1       | 1798 | 2515 | 7861 | 22579 | 46266 | 6532 | 3.12565 |
| 2       | 533  | 444  | 476  | 506   | 532   | 472  | 1.07207 |
| 3       | 174  | 168  | 175  | 183   | 190   | 174  | 1.04167 |

**Tab.S2. The viscosity of KH570 and PF.**

| Sample              | Rotor   | rotation<br>speed (rad/min) | viscosity (mPa.S) | Angle |
|---------------------|---------|-----------------------------|-------------------|-------|
| KH570               | Rotor 0 | 60                          | 2.2               | 23.7% |
| PF/ethanol solution | Rotor 0 | 60                          | 3.2               | 33.2% |

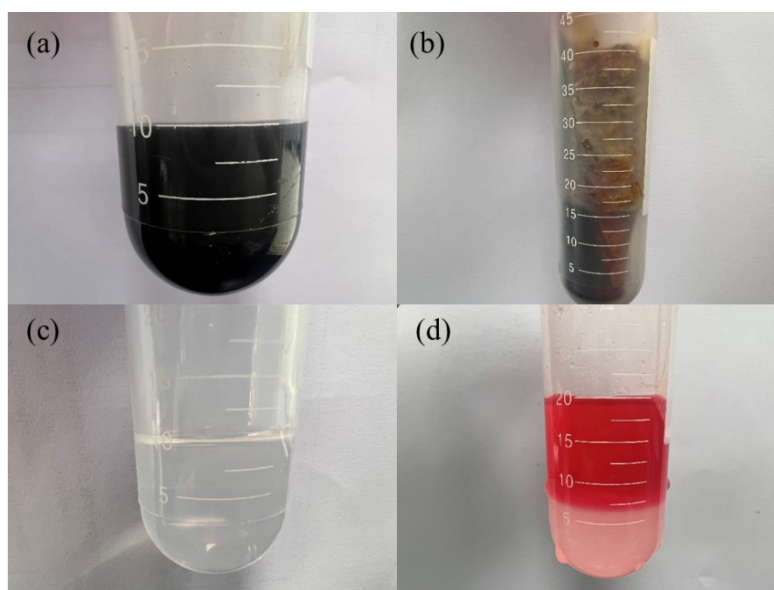

Fig. S1. The volume shrinkage comparison chart of phenol-formaldehyde resin and KH570. (a): Before curing of PF. (b): After curing of PF. (c): Before hydrolysis of KH570. (d): After hydrolysis of KH570.
